# Supplementary material for: Establishment of an age‐ and tumor microenvironment‐related gene signature for survival prediction in prostate cancer
Source: PubMed Central journal article supplement (PMC9678094; doi:10.1002/cam4.4776), 2022-05-09

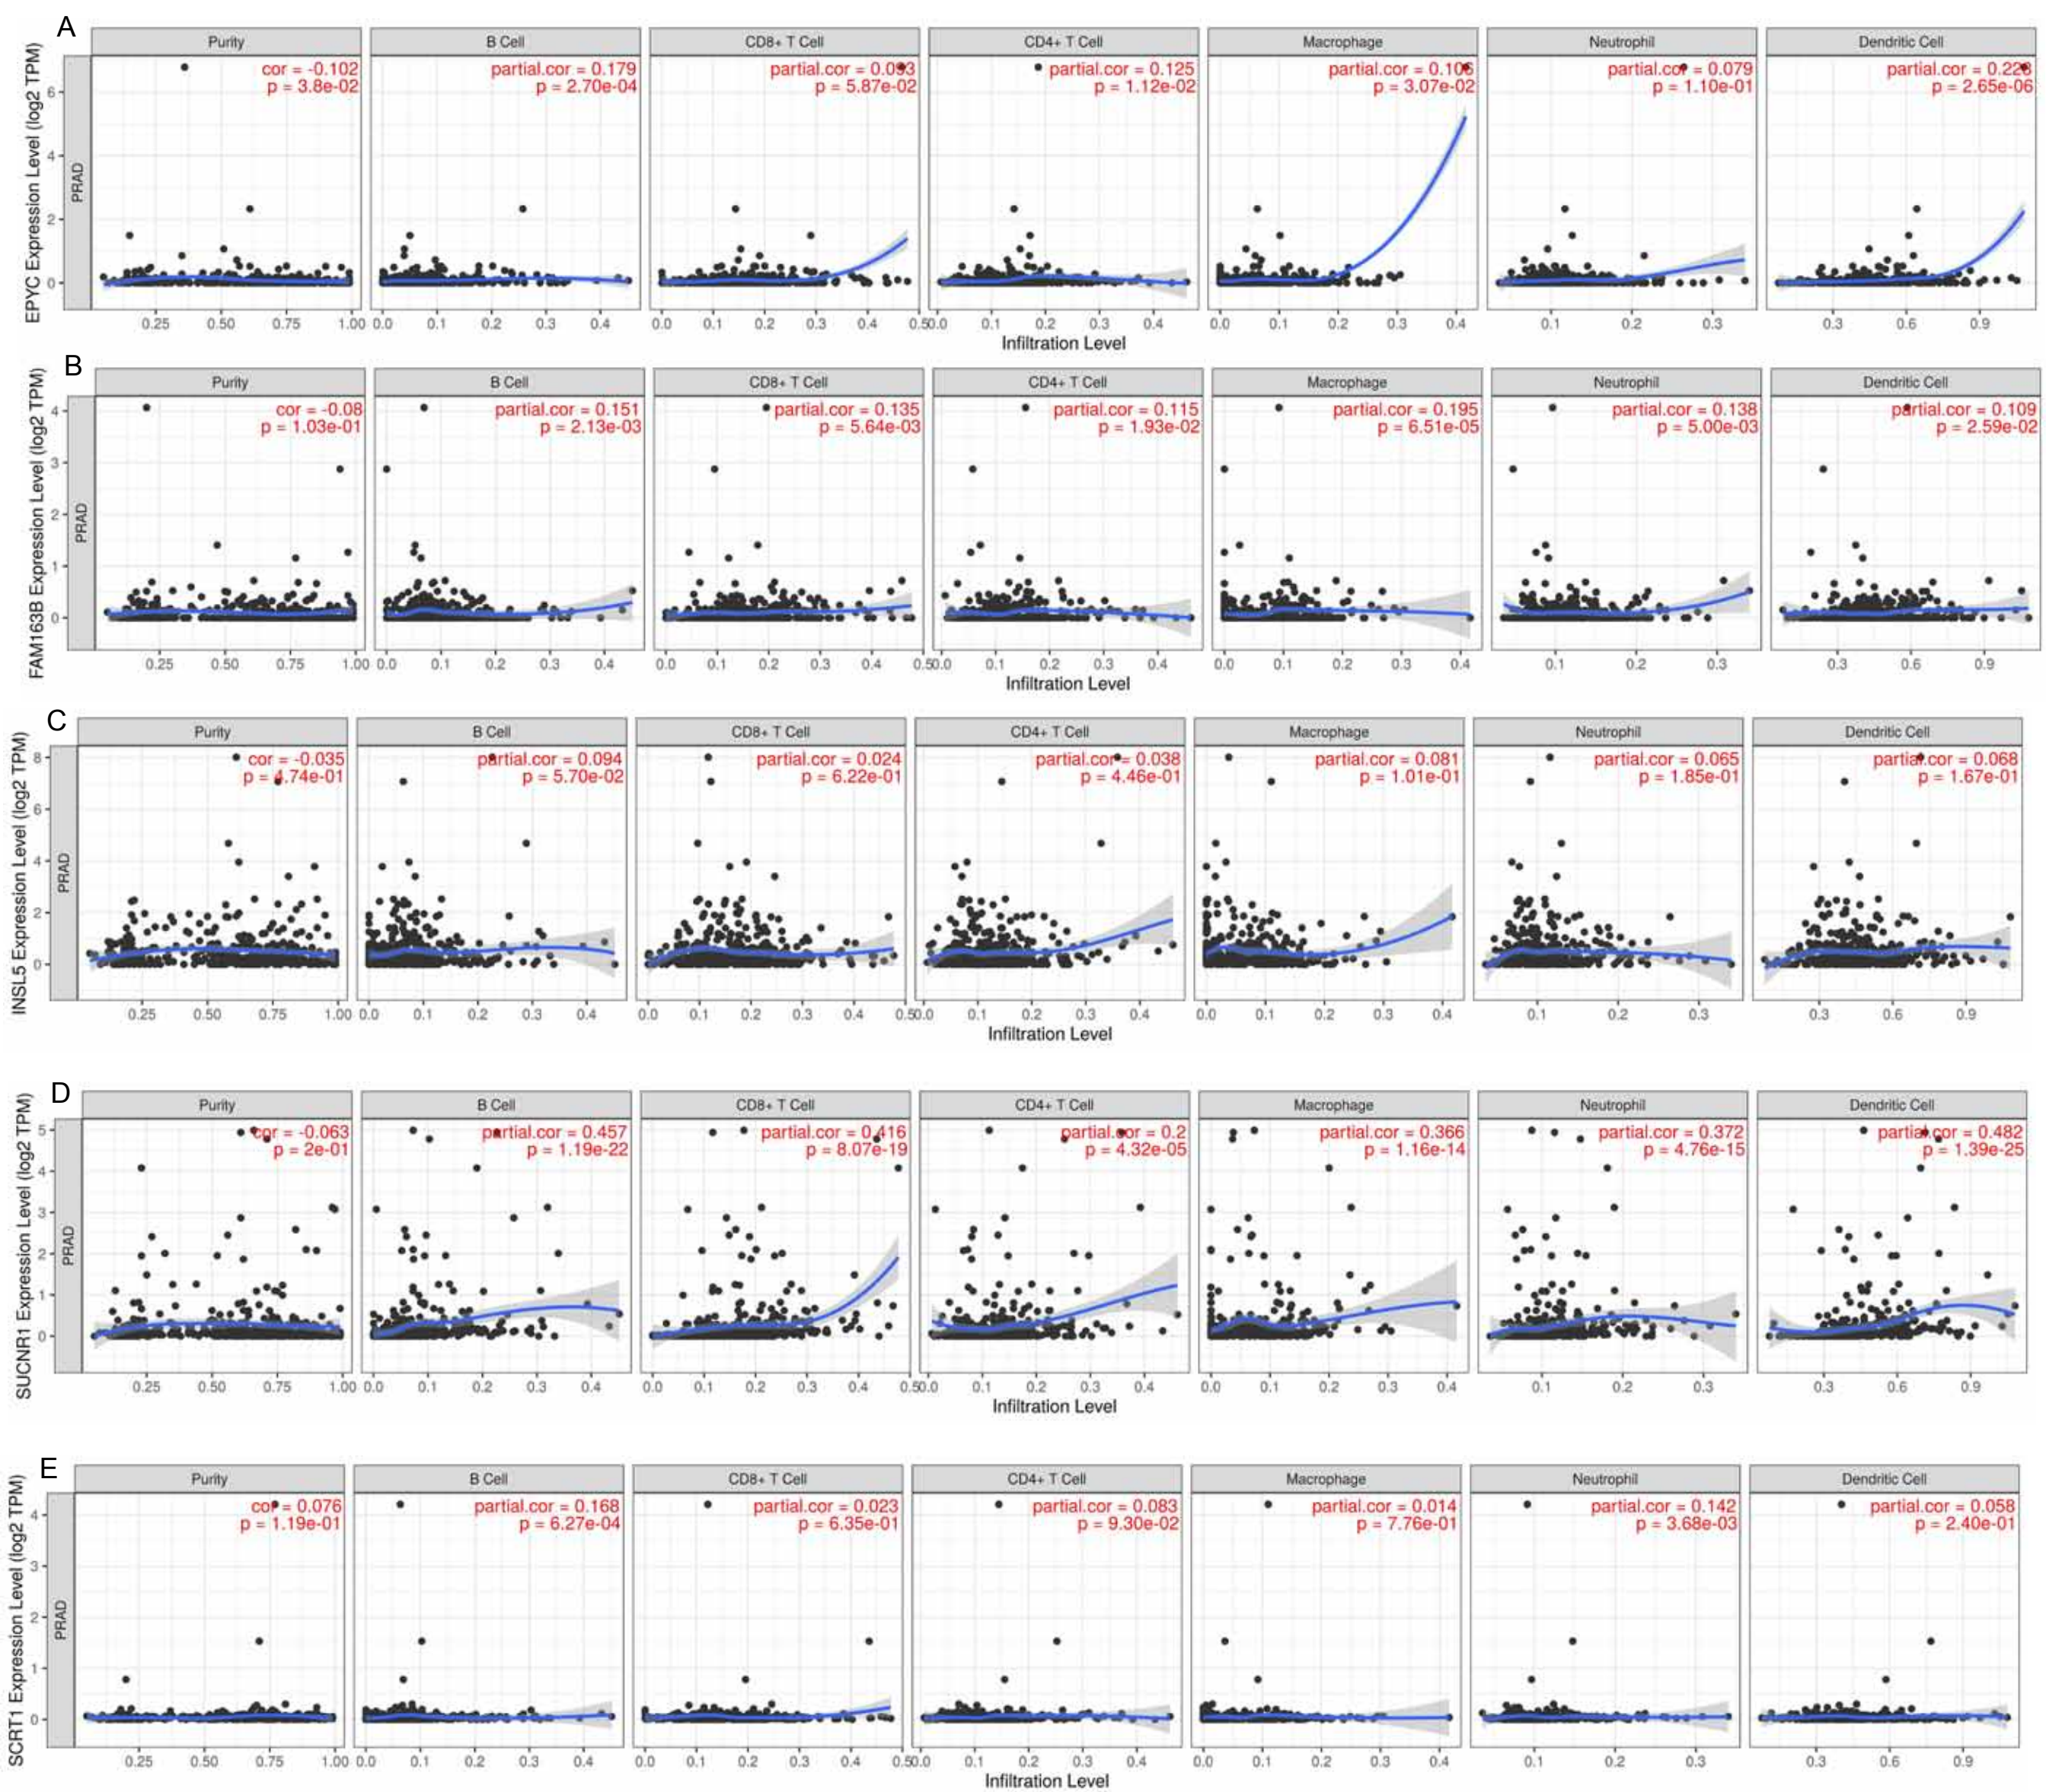

Supplement: CAM4-11-4374-s008.pdf [file CAM4-11-4374-s008.pdf]
